# Supplementary material for: Loss of H3K9 trimethylation leads to premature aging
Source: Research Square preprint supplement (doi:10.21203/rs.3.rs-4012025/v1), 2024-12-16
Supplement: Supplementary file 1 [file 16f30165bd17098c303dccca.xlsx]

## Sheet: Spleen
	baseMean	log2FoldChange	lfcSE	stat	pvalue	padj
RLTR6-int:ERV1:LTR	69668.1	5.83287	0.496418	11.7499	7.07027e-32	4.54371e-28
RLTR6B_Mm:ERV1:LTR	7844.13	5.62664	0.490044	11.4819	1.62643e-30	6.96817e-27
MuLV-int:ERV1:LTR	21828.2	3.91768	0.362423	10.8097	3.09704e-27	8.84582e-24
MMERVK10C-int:ERVK:LTR	3169.56	1.17515	0.160262	7.33268	2.25596e-13	6.37903e-11
Tigger17b:TcMar-Tigger:DNA	171.872	1.461	0.22761	6.41886	1.37298e-10	2.55753e-08
ERVB4_2-I_MM-int:ERVK:LTR	875.343	3.1266	0.506565	6.17215	6.73658e-10	1.103e-07
RLTR9F:ERVK:LTR	156.385	2.33754	0.407953	5.72992	1.0048e-08	1.25997e-06
IAP-d-int:ERVK:LTR	424.786	1.70388	0.30274	5.62819	1.82111e-08	2.09925e-06
ERVB4_1-I_MM-int:ERVK:LTR	370.396	2.01112	0.372147	5.40411	6.51308e-08	6.46429e-06
IAPLTR4_I:ERVK:LTR	44.7675	2.48427	0.481091	5.16383	2.41953e-07	1.97449e-05
IAPEY4_LTR:ERVK:LTR	93.7534	1.4855	0.29639	5.01199	5.38703e-07	4.00228e-05
LTRIS4:ERV1:LTR	96.5455	1.2343	0.247287	4.99136	5.9957e-07	4.32937e-05
MER133A:DNA:DNA?	11.8789	2.21494	0.445351	4.97346	6.57674e-07	4.69615e-05
RLTR17C_Mm:ERVK:LTR	498.047	0.785789	0.158095	4.97036	6.6828e-07	4.74553e-05
RLTR6_Mm:ERV1:LTR	11757.9	2.52987	0.510165	4.95893	7.08823e-07	5.016e-05
ERVB4_1B-I_MM-int:ERVK:LTR	2417.75	1.65412	0.337009	4.90824	9.18992e-07	6.136e-05
MMSAT4:Satellite:Satellite	3790.05	0.711442	0.146009	4.87257	1.10153e-06	7.23839e-05
RLTR48B:ERV1:LTR	326.954	0.692928	0.145175	4.77304	1.81467e-06	0.000108737
RLTR10D:ERVK:LTR	163.743	1.6083	0.338024	4.75794	1.95574e-06	0.000116375
L1M7:L1:LINE	130.909	1.12283	0.2404	4.67068	3.00208e-06	0.000167764
IAPEY4_I-int:ERVK:LTR	2357.68	1.06342	0.239407	4.4419	8.9167e-06	0.0004155
ETnERV3-int:ERVK:LTR	479.426	1.32185	0.318983	4.14396	3.41363e-05	0.00118263
ERVB5_1-LTR_MM:ERVK:LTR	57.5195	1.38381	0.338279	4.09074	4.29997e-05	0.00143017
RLTR13A1:ERVK:LTR	85.1481	1.15805	0.285595	4.05487	5.01631e-05	0.0016141
MMVL30-int:ERV1:LTR	134863	1.79959	0.450403	3.99552	6.4552e-05	0.00200283
RLTR45-int:ERVK:LTR	677.836	1.30513	0.329834	3.95694	7.59165e-05	0.00224813
ORR1D-int:ERVL-MaLR:LTR	644.652	0.655099	0.167968	3.90014	9.61382e-05	0.00268623
RLTR1C:ERV1:LTR	420.193	1.12542	0.2888	3.8969	9.74326e-05	0.00271355
MER101B:ERV1:LTR	4.849	3.73059	0.958149	3.89354	9.87908e-05	0.00274246
LTR48:ERV1:LTR	249.155	0.816426	0.211251	3.86472	0.000111217	0.00302533
MurSatRep1:MurSatRep1:Unknown	6352.82	0.470546	0.122048	3.85543	0.000115527	0.00310318
RLTR30E_MM:ERV1:LTR	100.847	1.22086	0.332169	3.67543	0.000237448	0.00547311
MERV1_I-int:ERV1:LTR	1751.38	0.786324	0.217521	3.61494	0.000300421	0.00647872
MuRRS4-int:ERV1:LTR	480.898	0.943065	0.262119	3.59784	0.000320866	0.00682231
RLTR13C1:ERVK:LTR	110.305	1.31659	0.369454	3.5636	0.000365799	0.00752258
IAPEz-int:ERVK:LTR	20495	0.466951	0.133445	3.49921	0.000466632	0.00900543
MER72:ERV1:LTR	12.2251	1.92066	0.554227	3.46548	0.000529286	0.00989876
RLTR50B:ERVK:LTR	78.0049	1.42402	0.413369	3.44492	0.000571219	0.0105034
RLTR41A2:ERV1:LTR	121.9	1.11445	0.324493	3.43443	0.000593808	0.0108105
ERVL-E-int:ERVL:LTR	358.895	0.799581	0.23413	3.41511	0.000637558	0.0113655
RLTR45:ERVK:LTR	451.787	1.20834	0.357063	3.3841	0.000714117	0.0123617
RMER16:ERVK:LTR	150.847	0.861557	0.257636	3.34409	0.000825526	0.0136382
RLTR19B:ERVK:LTR	238.682	0.672917	0.202525	3.32263	0.000891725	0.0144259
RLTR10B2:ERVK:LTR	210.19	1.09181	0.331731	3.29125	0.000997434	0.015682
L1MEg1:L1:LINE	62.856	0.87077	0.26513	3.28431	0.00102231	0.0159076
RLTR41B:ERV1:LTR	55.6571	1.0427	0.319255	3.26604	0.00109061	0.0166596
RLTR20D:ERVK:LTR	249.593	0.738677	0.226876	3.25586	0.00113048	0.0170842
RLTR10C:ERVK:LTR	788.193	0.641555	0.201379	3.18581	0.00144348	0.0204779
ERVB4_1B-LTR_MM:ERVK:LTR	485.922	0.902	0.285719	3.15695	0.00159431	0.0221411
MMERVK10D3_LTR:ERVK:LTR	34.9856	1.14951	0.364333	3.15512	0.00160431	0.0222287

## Sheet: Small intestine
	baseMean	log2FoldChange	lfcSE	stat	pvalue	padj
RLTR6-int:ERV1:LTR	51179.4	5.81721	0.324771	17.9117	9.55416e-72	2.20109e-67
RLTR6B_Mm:ERV1:LTR	5618.32	5.3154	0.312294	17.0205	5.78598e-65	6.66487e-61
RLTR6C_Mm:ERV1:LTR	787.248	3.12714	0.321498	9.72677	2.31845e-22	5.34125e-19
MMVL30-int:ERV1:LTR	63195.8	2.95236	0.326246	9.04951	1.43607e-19	2.20561e-16
MuLV-int:ERV1:LTR	14107.2	3.54578	0.457469	7.75085	9.12808e-15	5.68359e-12
RLTR6_Mm:ERV1:LTR	6538.85	2.42929	0.326906	7.43117	1.07642e-13	5.27631e-11
RMER12B:ERVK:LTR	3416.87	-1.08549	0.149989	-7.23715	4.58208e-13	1.84205e-10
L1M7:L1:LINE	187.68	1.45478	0.243863	5.96556	2.438e-09	4.07005e-07
MURVY-int:ERV1:LTR	490.666	2.20871	0.409475	5.394	6.89074e-08	7.38367e-06
ERVB7_4-LTR_MM:ERVK:LTR	178.696	-1.60546	0.307028	-5.22902	1.70407e-07	1.56408e-05
RLTR22_Mur:ERVK:LTR	1088.87	-1.3962	0.276481	-5.04991	4.42007e-07	3.53575e-05
SUBTEL_sa:Satellite:Satellite	117.246	-2.49613	0.518384	-4.81521	1.47042e-06	9.28094e-05
ORR1C1-int:ERVL-MaLR:LTR	2473.64	-1.30251	0.304634	-4.27565	1.90579e-05	0.000711599
MT-int:ERVL-MaLR:LTR	343.212	-1.14879	0.279404	-4.11157	3.92975e-05	0.0012368
IAP1-MM_I-int:ERVK:LTR	410.131	1.65747	0.424988	3.90004	9.61765e-05	0.00238874
MER68C:ERVL:LTR	13.5935	-1.49115	0.393486	-3.78959	0.000150898	0.00332669
ORR1A0-int:ERVL-MaLR:LTR	1816.7	-0.668441	0.17683	-3.78014	0.000156743	0.00340975
MamRep1151:LTR:LTR?	102.111	-1.00982	0.275869	-3.66049	0.000251735	0.00484906
ORR1A2-int:ERVL-MaLR:LTR	3637.44	-0.987362	0.270708	-3.64733	0.000264975	0.0049914
RLTR10D2:ERVK:LTR	126.507	1.38218	0.385053	3.58959	0.000331202	0.0058649
MMSAT4:Satellite:Satellite	3049.44	0.637777	0.178295	3.57709	0.000347434	0.00607298
IAP-d-int:ERVK:LTR	402.339	1.37592	0.385539	3.56881	0.0003586	0.00620389
MTA_Mm-int:ERVL-MaLR:LTR	6956.13	-0.952993	0.268727	-3.54633	0.000390641	0.00660635
MLT1G3-int:ERVL-MaLR:LTR	32.3149	-1.40327	0.405373	-3.46167	0.00053683	0.00831148
MMERVK10D3_I-int:ERVK:LTR	1219.2	1.06047	0.307654	3.44694	0.000566972	0.00861035
RMER30:hAT-Charlie:DNA	2994.09	-0.674203	0.19664	-3.42862	0.000606662	0.009052
ORR1A4-int:ERVL-MaLR:LTR	1609.52	-0.935626	0.275756	-3.39295	0.000691433	0.00997447
MamRep1879:hAT-Tip100:DNA	56.5138	-1.14971	0.340564	-3.3759	0.000735734	0.010382
MusHAL1:L1:LINE	2371.41	-0.994615	0.294795	-3.37392	0.000741052	0.0104163
IAPEY4_I-int:ERVK:LTR	684.87	0.623563	0.185072	3.3693	0.000753587	0.0105411
RLTR44E:ERVK:LTR	58.0344	-1.17128	0.348066	-3.36512	0.000765116	0.0106377
ORR1A1-int:ERVL-MaLR:LTR	1372.52	-0.90735	0.275503	-3.29343	0.000989721	0.0127523
RLTR12D:ERVK:LTR	559.893	-1.45605	0.443167	-3.28555	0.00101784	0.0129912
L1M3d:L1:LINE	99.7876	-0.97498	0.29937	-3.25678	0.00112685	0.0139048
RLTR22_Mus:ERVK:LTR	414.766	-1.06843	0.328916	-3.24833	0.00116085	0.0142103
RLTR9C:ERVK:LTR	266.234	-0.821118	0.255401	-3.21501	0.00130439	0.0154213
Helitron1Nb_Mam:Helitron:RC	29.9009	-0.865998	0.272275	-3.1806	0.00146969	0.0167369
MTB_Mm-int:ERVL-MaLR:LTR	295.651	-0.91894	0.289105	-3.17857	0.00148006	0.0168181
MLT1B-int:ERVL-MaLR:LTR	35.9247	-1.09359	0.346035	-3.16034	0.00157587	0.0176004
RLTR1B-int:ERV1:LTR	431.015	-0.836231	0.265138	-3.15394	0.00161081	0.0178757
RLTR20C1_MM:ERVK:LTR	2242.95	-0.989613	0.314332	-3.1483	0.00164222	0.0181282
MTEa-int:ERVL-MaLR:LTR	990.213	-0.713094	0.22719	-3.13876	0.00169666	0.0184028
MLTR31F_MM:ERVK:LTR	218.613	-0.906488	0.290314	-3.12244	0.00179357	0.0191741
MTC-int:ERVL-MaLR:LTR	2258.53	-0.83527	0.26753	-3.12215	0.00179535	0.0191754
FAM:Alu:SINE	63.0182	-0.682902	0.220763	-3.09337	0.001979	0.0204266
7SK:RNA:RNA	24718.5	-0.802798	0.259659	-3.09175	0.00198984	0.0204738
ORR1B2-int:ERVL-MaLR:LTR	452.468	-1.03318	0.336246	-3.0727	0.00212129	0.0213128
Kanga11a:TcMar-Tc2:DNA	92.7286	-0.77893	0.254945	-3.05529	0.00224846	0.0221084
L1ME3C:L1:LINE	155.765	-0.818689	0.269135	-3.04193	0.00235067	0.0227541
RLTR31B_Mm:ERVK:LTR	201.314	-0.711351	0.235278	-3.02345	0.00249907	0.0236831

## Sheet: Skin
	baseMean	log2FoldChange	lfcSE	stat	pvalue	padj
MuLV-int:ERV1:LTR	266342	8.65263	0.354837	24.3848	2.48053e-131	1.16129e-126
RLTR6-int:ERV1:LTR	23020.6	4.50521	0.402289	11.1989	4.12701e-29	3.22017e-25
MMERVK10D3_I-int:ERVK:LTR	2045.08	3.34922	0.367034	9.1251	7.1668e-20	1.59772e-16
RLTR6B_Mm:ERV1:LTR	2169.88	3.66027	0.402121	9.10242	8.83433e-20	1.79821e-16
RLTR10D2:ERVK:LTR	337.697	3.13201	0.344655	9.08739	1.0144e-19	1.97876e-16
RLTR44B:ERVK:LTR	301.516	2.75193	0.332191	8.2842	1.18907e-16	1.54632e-13
L1M7:L1:LINE	277.953	1.67986	0.217039	7.73986	9.95235e-15	1.01289e-11
RLTR44-int:ERVK:LTR	1103.05	2.60462	0.343824	7.57545	3.57889e-14	3.30644e-11
MMERVK10C-int:ERVK:LTR	8782.61	2.52947	0.335983	7.52857	5.12996e-14	4.61854e-11
RLTR6C_Mm:ERV1:LTR	406.864	2.704	0.374812	7.21428	5.42186e-13	4.16114e-10
IAPLTR1a_Mm:ERVK:LTR	1689.47	1.82668	0.264154	6.91521	4.67166e-12	3.06251e-09
IAPA_MM-int:ERVK:LTR	80.7988	1.66933	0.24144	6.91405	4.70994e-12	3.06251e-09
RLTR17C_Mm:ERVK:LTR	351.728	1.43917	0.219959	6.54291	6.03343e-11	3.32307e-08
RLTR1B-int:ERV1:LTR	1655.22	1.68834	0.262286	6.43703	1.21834e-10	5.88019e-08
ERVB4_3-I_MM-int:ERVK:LTR	276.973	1.83941	0.28906	6.36341	1.97317e-10	8.96852e-08
IAP-d-int:ERVK:LTR	1255.39	2.01343	0.322698	6.23935	4.39398e-10	1.88724e-07
MMVL30-int:ERV1:LTR	37557.8	2.78299	0.450903	6.17203	6.74167e-10	2.81802e-07
RLTR44A:ERVK:LTR	175.27	1.86307	0.3029	6.15076	7.7112e-10	3.16673e-07
ERVB4_2-I_MM-int:ERVK:LTR	1115.48	2.26871	0.373698	6.07096	1.27147e-09	5.04448e-07
IAP1-MM_I-int:ERVK:LTR	791.526	1.67965	0.284021	5.91382	3.34263e-09	1.15918e-06
LTR105_Mam:ERVL:LTR	91.9838	1.6172	0.279388	5.78837	7.10726e-09	2.17473e-06
RLTR20C2_MM:ERVK:LTR	2725.12	1.11929	0.196688	5.69069	1.26524e-08	3.74896e-06
ERVB5_1-I_MM-int:ERVK:LTR	408.539	1.98695	0.356858	5.5679	2.57833e-08	6.93718e-06
RLTR4_Mm:ERV1:LTR	6723.75	2.84626	0.51539	5.52254	3.34139e-08	8.58169e-06
RLTR50A:ERVK:LTR	54.6611	1.89434	0.343062	5.52185	3.35451e-08	8.58169e-06
MMERGLN-int:ERV1:LTR	2148.2	1.67015	0.305802	5.46154	4.7202e-08	1.11607e-05
ERVB4_1B-LTR_MM:ERVK:LTR	683.813	1.97082	0.361621	5.44996	5.03807e-08	1.18524e-05
RLTR10C:ERVK:LTR	1868.85	1.76863	0.324756	5.44602	5.15103e-08	1.20575e-05
LTR41B:ERVL:LTR	205.44	1.62273	0.300874	5.3934	6.91358e-08	1.55609e-05
MER133B:DNA:DNA?	14.312	2.05296	0.3823	5.37001	7.87303e-08	1.73044e-05
RLTR6_Mm:ERV1:LTR	3990.6	2.50944	0.469263	5.34761	8.91222e-08	1.88794e-05
Eulor10:DNA:DNA?	11.796	2.26881	0.425243	5.33532	9.53744e-08	1.99332e-05
RLTR1B:ERV1:LTR	1024.34	1.59097	0.299634	5.30973	1.09791e-07	2.25437e-05
MLT1G1:ERVL-MaLR:LTR	899.997	1.56015	0.294136	5.30418	1.13181e-07	2.29666e-05
LTR108a_Mam:ERVL:LTR	45.5023	1.54676	0.291753	5.3016	1.14794e-07	2.29666e-05
LTR52-int:ERVL:LTR	29.7004	2.06401	0.390097	5.29103	1.21631e-07	2.40265e-05
RLTR30D2_MM:ERV1:LTR	754.597	1.52118	0.289466	5.25513	1.4792e-07	2.77979e-05
RMER16C:ERVK:LTR	145.584	1.69027	0.32244	5.24211	1.58755e-07	2.91461e-05
RLTR44D:ERVK:LTR	78.7883	2.01919	0.385276	5.24089	1.59804e-07	2.92156e-05
ERVB7_3-LTR_MM:ERVK:LTR	275.345	1.87202	0.359933	5.20103	1.98188e-07	3.46208e-05
IAPLTR2_Mm:ERVK:LTR	1274.38	1.55991	0.301671	5.17091	2.32952e-07	3.92298e-05
RLTR10D:ERVK:LTR	365.796	2.07332	0.401881	5.15905	2.48211e-07	4.07728e-05
MER74B:ERVL:LTR	275.844	1.37128	0.266147	5.15237	2.57222e-07	4.1531e-05
ERVB4_2-LTR_MM:ERVK:LTR	104.83	2.15781	0.418855	5.15169	2.5815e-07	4.1531e-05
RLTR46A2:ERVK:LTR	31.2277	1.89874	0.369809	5.13438	2.83074e-07	4.50762e-05
MER54A:ERVL:LTR	244.431	1.56493	0.305458	5.12322	3.00365e-07	4.71796e-05
IAPLTR2b:ERVK:LTR	632.347	1.75816	0.34534	5.09111	3.55981e-07	5.42854e-05
MER54B:ERVL:LTR	69.2904	2.08071	0.40883	5.08942	3.59151e-07	5.44143e-05
MLTR18C_MM:ERVK:LTR	549.037	1.44538	0.284979	5.0719	3.93866e-07	5.85373e-05
MER110-int:ERV1:LTR	23.4012	2.25297	0.444633	5.06704	4.04048e-07	5.92976e-05

## Sheet: Skeletal muscle
	baseMean	log2FoldChange	lfcSE	stat	pvalue	padj
MuLV-int:ERV1:LTR	285553	8.97377	0.284892	31.4988	9.02037e-218	1.78243e-213
RLTR6-int:ERV1:LTR	17796.9	4.87272	0.299565	16.266	1.72e-59	6.79742e-56
RLTR6B_Mm:ERV1:LTR	1489.93	3.8092	0.280865	13.5624	6.69314e-42	1.32256e-38
RLTR17C_Mm:ERVK:LTR	369.3	2.34959	0.210032	11.1869	4.72878e-29	4.24731e-26
RLTR6C_Mm:ERV1:LTR	341.128	3.332	0.393713	8.46303	2.60528e-17	1.00942e-14
ERVB4_2-I_MM-int:ERVK:LTR	577.145	1.70073	0.21548	7.89272	2.95664e-15	9.57756e-13
IAPLTR1_Mm:ERVK:LTR	2698.11	1.80502	0.230483	7.83144	4.82319e-15	1.44403e-12
RLTR20C2_MM:ERVK:LTR	1560.31	1.14523	0.155855	7.34805	2.01122e-13	4.62113e-11
IAPEz-int:ERVK:LTR	22580.2	1.92179	0.268173	7.16622	7.7096e-13	1.6036e-10
MMVL30-int:ERV1:LTR	18835.2	2.93659	0.41054	7.15299	8.49072e-13	1.72966e-10
ORR1D-int:ERVL-MaLR:LTR	332.953	0.996064	0.147287	6.76274	1.35402e-11	2.0424e-09
IAPLTR1a_Mm:ERVK:LTR	944.551	1.66916	0.260484	6.40791	1.47525e-10	1.68502e-08
Tigger17b:TcMar-Tigger:DNA	82.5623	1.5517	0.260874	5.94807	2.7133e-09	2.1886e-07
L1M7:L1:LINE	145.926	1.23143	0.209524	5.87728	4.17054e-09	3.27023e-07
RLTR6_Mm:ERV1:LTR	1744.5	2.36707	0.404332	5.85428	4.79071e-09	3.64094e-07
LTR105_Mam:ERVL:LTR	61.5448	1.86629	0.322829	5.78105	7.42367e-09	5.33058e-07
MER113B:hAT-Charlie:DNA	57.1619	1.71764	0.324505	5.29311	1.20252e-07	5.5779e-06
LTR48:ERV1:LTR	225.766	1.20638	0.230661	5.23009	1.69427e-07	7.32578e-06
RLTR13A:ERVK:LTR	150.803	0.741533	0.154444	4.80131	1.57628e-06	4.56704e-05
MMERVK10C-int:ERVK:LTR	1896.62	0.761383	0.163212	4.665	3.0862e-06	7.83847e-05
RLTR44A:ERVK:LTR	80.9313	1.17919	0.253196	4.65721	3.20521e-06	8.05788e-05
RLTR10-int:ERVK:LTR	1349.89	0.75887	0.16352	4.64085	3.46975e-06	8.61334e-05
RLTR48A:ERV1:LTR	357.602	0.760728	0.165329	4.60129	4.1988e-06	0.000100812
MER44D:TcMar-Tigger:DNA	554.287	0.794323	0.174367	4.55547	5.22676e-06	0.000120938
YREP_Mm:YREP_Mm:Unknown	1644.85	0.630193	0.139401	4.52072	6.16294e-06	0.000138386
Charlie1b:hAT-Charlie:DNA	467.249	0.750134	0.171351	4.37776	1.19904e-05	0.000236931
ORR1B2-int:ERVL-MaLR:LTR	380.634	0.647719	0.150357	4.30788	1.64824e-05	0.00030238
MER45C:hAT-Tip100:DNA	78.8273	0.766888	0.181538	4.22439	2.39588e-05	0.000413834
MTB-int:ERVL-MaLR:LTR	577.162	0.625761	0.149276	4.19198	2.7653e-05	0.000461525
Tigger1:TcMar-Tigger:DNA	660.011	0.710468	0.173316	4.09927	4.14458e-05	0.000640851
L1MDb:L1:LINE	292.43	0.724103	0.177694	4.075	4.60135e-05	0.000697719
L1ME4c:L1:LINE	439.899	0.712289	0.175947	4.04831	5.15877e-05	0.000760159
RLTR12E:ERVK:LTR	219.816	0.636725	0.159357	3.99559	6.45329e-05	0.000906949
MER58A:hAT-Charlie:DNA	2210	0.721834	0.18241	3.9572	7.58336e-05	0.00102635
MERVL-int:ERVL:LTR	2499.44	0.589126	0.150661	3.91028	9.219e-05	0.00119847
MER119:hAT-Charlie:DNA	256.473	0.660601	0.169477	3.89788	9.70397e-05	0.00125245
ERVB5_1-LTR_MM:ERVK:LTR	39.147	0.955175	0.246107	3.88113	0.000103972	0.00132037
IAPA_MM-int:ERVK:LTR	37.5223	1.01988	0.263092	3.87652	0.000105961	0.00134132
Charlie1a:hAT-Charlie:DNA	2281.4	0.720771	0.18731	3.84801	0.00011908	0.00147248
PB1D9:Alu:SINE	17018.9	0.703157	0.183015	3.84208	0.000121996	0.00149822
RLTR19-int:ERVK:LTR	1312.56	0.381852	0.100188	3.81136	0.000138206	0.00165022
RLTR44-int:ERVK:LTR	304.971	1.12307	0.295491	3.80068	0.000144297	0.00170431
Tigger11a:TcMar-Tigger:DNA	32.3413	0.904479	0.23854	3.79173	0.000149601	0.00174712
Tigger14a:TcMar-Tigger:DNA	125.706	0.773446	0.204108	3.7894	0.000151012	0.0017592
UCON29:PiggyBac:DNA	85.5252	0.825946	0.219058	3.77045	0.000162955	0.00186019
B1F:Alu:SINE	20619.7	0.673707	0.178804	3.76786	0.000164652	0.00187631
MER20B:hAT-Charlie:DNA	603.835	0.959832	0.255223	3.76075	0.000169403	0.00191994
LTR106_Mam:LTR:LTR	108.587	1.05583	0.28109	3.75621	0.000172503	0.00194745
HAL1_SS:L1:LINE	66.4119	1.21231	0.323815	3.74385	0.000181223	0.00201745
MER105:DNA:DNA	125.574	0.728817	0.194681	3.74365	0.000181366	0.0020179

## Sheet: Liver
	baseMean	log2FoldChange	lfcSE	stat	pvalue	padj
RLTR6-int:ERV1:LTR	22837.4	3.8272	0.390922	9.79019	1.24062e-22	1.28298e-18
RLTR6B_Mm:ERV1:LTR	2560.77	3.20024	0.414372	7.72311	1.13528e-14	3.35019e-11
L1Md_F:L1:LINE	2368.29	-1.35228	0.203033	-6.66038	2.73118e-11	1.76528e-08
L1MCb:L1:LINE	311.509	-1.33275	0.202281	-6.58861	4.43974e-11	2.62363e-08
ETnERV2-int:ERVK:LTR	757.478	-2.0469	0.320616	-6.38427	1.7222e-10	8.68788e-08
RLTR9A3A:ERVK:LTR	297.965	-2.95349	0.511013	-5.77968	7.48406e-09	1.57107e-06
HAL1ME:L1:LINE	1088.06	-1.85332	0.32823	-5.64642	1.63827e-08	2.99861e-06
UCON28a:UCON28a:Unknown	49.3525	-1.15679	0.20681	-5.59347	2.22569e-08	3.80446e-06
RMER16-int:ERVK:LTR	1748.35	-1.86621	0.336098	-5.55259	2.81469e-08	4.58396e-06
IAPLTR3-int:ERVK:LTR	505.624	-0.748027	0.135375	-5.52557	3.28414e-08	5.1459e-06
LTR16A2:ERVL:LTR	86.3842	-1.19805	0.225932	-5.30271	1.14095e-07	1.34081e-05
Zaphod:hAT-Tip100:DNA	122.419	-0.90351	0.171449	-5.26985	1.36536e-07	1.53477e-05
MLT1G:ERVL-MaLR:LTR	167.992	-0.86824	0.166739	-5.20718	1.91729e-07	1.96314e-05
RLTR1D:ERV1:LTR	261.577	-0.789995	0.152448	-5.18207	2.1944e-07	2.12088e-05
RLTR22_Mus:ERVK:LTR	267.287	-1.27303	0.246971	-5.1546	2.54176e-07	2.41153e-05
RLTR21:ERVK:LTR	695.55	-0.833913	0.164633	-5.0653	4.07764e-07	3.42837e-05
MLT-int:ERVL-MaLR:LTR	322.465	-1.12199	0.228422	-4.91192	9.01898e-07	6.27159e-05
L1MEh:L1:LINE	126.133	-1.19158	0.242608	-4.91155	9.03608e-07	6.27159e-05
MRLTR33:ERVK:LTR	118.323	-0.775578	0.159474	-4.86336	1.1541e-06	7.70008e-05
MLT1F1:ERVL-MaLR:LTR	563.815	-1.29557	0.26752	-4.8429	1.2796e-06	8.29654e-05
RLTR13D2:ERVK:LTR	82.5744	-0.846131	0.175761	-4.81409	1.47871e-06	9.23142e-05
MER70B:ERVL:LTR	49.675	-1.30034	0.270572	-4.80588	1.54068e-06	9.54071e-05
MER66A:ERV1:LTR	7.76557	-2.3189	0.51037	-4.54357	5.53107e-06	0.00026059
ORR1B1:ERVL-MaLR:LTR	5199.12	-0.582875	0.129061	-4.51626	6.29411e-06	0.000288054
RLTR47:ERVK:LTR	97.0326	-1.30177	0.288273	-4.51576	6.30908e-06	0.000288059
LTR37A:ERV1:LTR	100.088	-0.987006	0.218753	-4.51196	6.42318e-06	0.000292623
MusHAL1:L1:LINE	1835.93	-0.75041	0.166534	-4.50606	6.60434e-06	0.000297598
RLTR10B2:ERVK:LTR	228.213	-0.846737	0.189384	-4.471	7.78542e-06	0.000339002
L1Md_F3:L1:LINE	6560	-0.688026	0.154412	-4.45577	8.35908e-06	0.000357952
RLTR13D3:ERVK:LTR	228.405	-1.1342	0.257108	-4.41135	1.02728e-05	0.000414175
L1_Mus4:L1:LINE	4713.09	-0.844538	0.191578	-4.40833	1.04171e-05	0.000418407
RMER6C:ERVK:LTR	1189.15	-0.919672	0.208832	-4.40388	1.06333e-05	0.00042622
RLTR11D:ERVK:LTR	234.3	-0.881954	0.200427	-4.40037	1.08067e-05	0.000429838
RLTR20A2B_MM:ERVK:LTR	120.253	-1.44796	0.330113	-4.38625	1.1532e-05	0.000448223
UCON16:UCON16:Unknown	51.3563	-1.65301	0.381338	-4.33476	1.45918e-05	0.000533618
MMERVK10C-int:ERVK:LTR	1403.32	-0.798968	0.186208	-4.29073	1.78088e-05	0.000622195
LTR41:ERVL:LTR	179.697	-0.589852	0.138732	-4.25174	2.12116e-05	0.000708756
MER31B:ERV1:LTR	262.615	-0.990934	0.235447	-4.20873	2.56805e-05	0.000816493
RMER12B:ERVK:LTR	984.064	-0.751506	0.180803	-4.15649	3.23177e-05	0.000978032
MER73:ERVL:LTR	42.4052	-1.44946	0.35369	-4.0981	4.16549e-05	0.00118834
L1MD1:L1:LINE	816.614	-0.919108	0.22435	-4.09676	4.18974e-05	0.00119033
MER89:ERV1:LTR	219.356	-1.78045	0.436816	-4.07597	4.58239e-05	0.00127048
RLTR10C:ERVK:LTR	376.008	-0.393875	0.0969228	-4.0638	4.82803e-05	0.00131913
Lx8b:L1:LINE	5801.78	-0.699752	0.174336	-4.01381	5.97453e-05	0.00154456
LTR50:ERVL:LTR	98.0142	-0.921495	0.232335	-3.96624	7.30156e-05	0.00178087
L1M3d:L1:LINE	44.9093	-1.09327	0.27585	-3.96329	7.39248e-05	0.00179881
L1Md_F2:L1:LINE	39641.6	-0.752684	0.189945	-3.96264	7.41256e-05	0.00179946
RLTR16B_MM:ERVK:LTR	140.646	-0.581126	0.149316	-3.89192	9.94538e-05	0.00228556
MLTR32C_MM:ERVK:LTR	43.2876	-1.21981	0.314841	-3.87436	0.000106907	0.00240643
RLTR19C:ERVK:LTR	105.126	-0.986829	0.255534	-3.86184	0.000112538	0.0024921

## Sheet: Kidney
	baseMean	log2FoldChange	lfcSE	stat	pvalue	padj
RLTR6B_Mm:ERV1:LTR	6968.2	5.31144	0.28173	18.8529	2.78067e-79	6.77289e-75
RLTR6-int:ERV1:LTR	60740.7	5.57967	0.36237	15.3977	1.69639e-53	9.99713e-50
MURVY-int:ERV1:LTR	3447.74	4.48797	0.292296	15.3542	3.32119e-53	1.34824e-49
MuLV-int:ERV1:LTR	175914	6.27318	0.426828	14.6972	6.71626e-49	2.33697e-45
MMERVK10C-int:ERVK:LTR	4870.48	2.65795	0.211348	12.5762	2.85376e-36	4.08876e-33
RLTR4_Mm:ERV1:LTR	15290.6	2.69461	0.254539	10.5862	3.45168e-26	2.33535e-23
ETnERV-int:ERVK:LTR	7018.69	2.77545	0.274008	10.1291	4.10411e-24	2.2719e-21
IAP-d-int:ERVK:LTR	938.594	2.65175	0.272101	9.74547	1.9288e-22	9.78746e-20
RLTR4_MM-int:ERV1:LTR	45153.5	2.39608	0.262632	9.12333	7.28476e-20	2.86185e-17
RLTR1B-int:ERV1:LTR	1142.07	2.11527	0.233681	9.05195	1.40439e-19	5.18282e-17
L1M7:L1:LINE	428.774	1.64682	0.1852	8.89212	5.99539e-19	2.02718e-16
MMERVK10D3_I-int:ERVK:LTR	454.912	1.64162	0.21319	7.70026	1.35791e-14	2.56453e-12
RLTR17C_Mm:ERVK:LTR	429.331	1.80811	0.239701	7.54322	4.58515e-14	8.15186e-12
RNERVK23-int:ERVK:LTR	235.627	2.75844	0.368109	7.49354	6.70391e-14	1.15807e-11
RLTR6C_Mm:ERV1:LTR	732.759	3.38177	0.456433	7.40913	1.27128e-13	2.07815e-11
IAPEY4_I-int:ERVK:LTR	1570.75	2.03166	0.275025	7.38717	1.49991e-13	2.37229e-11
RLTR10D2:ERVK:LTR	111.326	1.88375	0.261205	7.21179	5.52207e-13	8.05396e-11
Tigger17b:TcMar-Tigger:DNA	143.047	1.67728	0.232914	7.20128	5.9652e-13	8.59731e-11
RLTR30D_RN:ERV1:LTR	125.234	2.49074	0.352178	7.07238	1.52297e-12	2.03189e-10
Lx3B:L1:LINE	3125.87	1.01304	0.14627	6.92587	4.33312e-12	5.22386e-10
RLTR44-int:ERVK:LTR	228.696	1.00991	0.152368	6.62813	3.39972e-11	3.50877e-09
RLTR20C2_MM:ERVK:LTR	1965.8	1.04411	0.158191	6.60034	4.10225e-11	4.18069e-09
ERVB7_1-LTR_MM:ERVK:LTR	417.8	1.5735	0.240022	6.55564	5.54048e-11	5.53072e-09
IAPLTR1_Mm:ERVK:LTR	4293.73	1.11344	0.170978	6.51215	7.40825e-11	7.10405e-09
RLTR44C:ERVK:LTR	88.8628	1.33346	0.214552	6.2151	5.12931e-10	4.15065e-08
SRV_MM-int:ERVK:LTR	137.608	2.37598	0.386622	6.14547	7.97247e-10	6.18425e-08
RLTR45-int:ERVK:LTR	530.01	0.919031	0.150532	6.10523	1.02653e-09	7.71702e-08
RLTR13A1:ERVK:LTR	89.0887	0.985434	0.163421	6.03005	1.63909e-09	1.19383e-07
LTRIS4:ERV1:LTR	82.8621	1.53031	0.257606	5.94051	2.84135e-09	1.94401e-07
MurSatRep1:MurSatRep1:Unknown	9217.01	0.855597	0.149171	5.73567	9.71295e-09	5.8559e-07
RLTR48B:ERV1:LTR	119.047	1.52316	0.270829	5.62407	1.86515e-08	1.07145e-06
IAPEz-int:ERVK:LTR	40869.4	1.20615	0.221983	5.43351	5.52548e-08	2.798e-06
RLTR6_Mm:ERV1:LTR	9873.38	1.45258	0.270609	5.36781	7.97e-08	3.87476e-06
IAPEY4_LTR:ERVK:LTR	66.6048	1.54497	0.303737	5.08656	3.64623e-07	1.52335e-05
ORR1D-int:ERVL-MaLR:LTR	569.631	1.21477	0.243086	4.99726	5.815e-07	2.30479e-05
MLTR12:ERV1:LTR	316.337	0.841673	0.171213	4.91594	8.83555e-07	3.33655e-05
MERV1_LTR:ERV1:LTR	288.261	1.10137	0.226218	4.86864	1.1237e-06	4.08508e-05
RLTR10C:ERVK:LTR	812.216	0.934565	0.200918	4.65147	3.29584e-06	0.000104611
LTR48:ERV1:LTR	237.965	0.857256	0.185183	4.62924	3.67008e-06	0.000114166
RLTR10-int:ERVK:LTR	1989.82	0.973114	0.212303	4.5836	4.57032e-06	0.000137942
ERVB5_1-LTR_MM:ERVK:LTR	44.8362	0.971139	0.213319	4.55252	5.30076e-06	0.000155555
RMER12B:ERVK:LTR	1623.76	1.3429	0.310793	4.3209	1.55394e-05	0.000393854
MMSAT4:Satellite:Satellite	5257.13	0.518524	0.121327	4.27376	1.92201e-05	0.000471272
RLTR1B:ERV1:LTR	485.806	0.815845	0.19609	4.16057	3.1746e-05	0.000705472
RLTR13D5:ERVK:LTR	391.282	1.44019	0.357758	4.0256	5.68294e-05	0.00113589
MMERGLN_LTR:ERV1:LTR	356.235	1.25085	0.31258	4.00168	6.28951e-05	0.00122054
RLTR3_Mm:ERVK:LTR	92.2167	1.27012	0.319592	3.97418	7.06212e-05	0.00134418
LTR109A2:ERV1:LTR	26.0224	1.08547	0.275208	3.94419	8.00687e-05	0.00148307
IAPLTR4:ERVK:LTR	104.252	0.843874	0.218154	3.86826	0.000109617	0.0018972
RLTR12H:ERVK:LTR	190.213	-1.88258	0.495198	-3.80168	0.000143717	0.00233992

## Sheet: Liver old vs young
	baseMean	log2FoldChange	lfcSE	stat	pvalue	padj
IAPLTR3-int:ERVK:LTR	803.06	2.68192	0.285902	9.38054	6.56366e-21	5.72433e-18
HAL1ME:L1:LINE	2044.93	0.866006	0.146193	5.92372	3.14738e-09	3.76444e-07
ETnERV3-int:ERVK:LTR	885.06	2.28912	0.396608	5.77175	7.84535e-09	8.30556e-07
RMER17A-int:ERVK:LTR	171.84	2.29703	0.484844	4.73767	2.16189e-06	0.00011341
RLTR20A3_MM:ERVK:LTR	604.211	1.4439	0.309964	4.6583	3.18825e-06	0.000158511
MMTV-int:ERVK:LTR	97.4899	1.80968	0.418046	4.32889	1.49862e-05	0.000567227
MER91B:hAT-Tip100:DNA	294.982	-0.97598	0.240279	-4.06187	4.86815e-05	0.00148103
LTRIS_Mus:ERV1:LTR	653.105	1.31732	0.332916	3.95691	7.59248e-05	0.00209103
MTB-int:ERVL-MaLR:LTR	1029.96	1.03323	0.262475	3.93648	8.2686e-05	0.00224766
RLTR44C:ERVK:LTR	73.6814	1.82417	0.46722	3.9043	9.44981e-05	0.00248485
RLTR51B_Mm:ERVK:LTR	319.103	1.61211	0.413372	3.89991	9.62283e-05	0.00251141
RLTR3_Mm:ERVK:LTR	20.2413	2.38091	0.619209	3.84508	0.000120511	0.00298864
MMSAT4:Satellite:Satellite	5059.92	0.793518	0.216525	3.66478	0.000247549	0.00523908
L1MCb:L1:LINE	650.579	0.997491	0.281064	3.54899	0.000386717	0.0074328
L1M3d:L1:LINE	67.4719	1.55001	0.457457	3.38832	0.000703214	0.0121644
RLTR18-int:ERVK:LTR	419.651	1.18391	0.35074	3.37548	0.000736879	0.0126631
Tigger17c:TcMar-Tigger:DNA	423.032	0.953505	0.282669	3.37322	0.000742934	0.0127462
IAPLTR4:ERVK:LTR	143.912	1.8353	0.552502	3.3218	0.000894397	0.0146944
MLT1B-int:ERVL-MaLR:LTR	112.248	2.97663	0.909538	3.27268	0.00106533	0.0167784
RLTR44A:ERVK:LTR	58.5747	1.72242	0.562405	3.06259	0.00219431	0.0280397
RLTR13D3:ERVK:LTR	487.364	0.890591	0.294823	3.02076	0.00252137	0.0309884
RLTR6B_Mm:ERV1:LTR	978.664	1.15227	0.388872	2.96311	0.0030455	0.0353945
ETnERV-int:ERVK:LTR	1469.34	0.88266	0.301359	2.92893	0.00340128	0.0382465
RLTR20B1:ERVK:LTR	421.73	0.732832	0.250413	2.92649	0.00342807	0.0383409
MER90:ERV1:LTR	68.4176	1.70652	0.591148	2.88679	0.00389195	0.0421648
Eulor1:DNA:DNA	49.673	1.0338	0.366408	2.82146	0.0047806	0.0488904
7SK:RNA:RNA	29241	-0.343069	0.121652	-2.82007	0.00480127	0.049028
